# Supplementary material for: Subtle influence on alginate gel properties through host–guest interactions between covalently appended cyclodextrin and adamantane units
Source: Royal Society of Chemistry journal article supplement (doi:10.1039/d1nj01278a), 2021-01-01
Supplement: d1nj01278a1.pdf [file d1nj01278a1.pdf]

**Subtle influence on alginate gel properties through host–guest interactions between covalently appended cyclodextrin and adamantane units**

Elena Irina Popescu,<sup>a</sup> Ludmila Aricov,<sup>\*a</sup> Sorin Mocanu,<sup>a</sup> Iulia Matei,<sup>a</sup> Elena Hristea,<sup>a</sup> Rodica Baratoiu,<sup>a</sup> Anca Leonties,<sup>a</sup> Cristian Petcu,<sup>b</sup> Elvira Alexandrescu<sup>b</sup> and Gabriela Ionita<sup>\*a</sup>

<sup>a</sup> *“Ilie Murgulescu” Institute of Physical Chemistry of the Romanian Academy, 202 Splaiul Independentei, Bucharest 060021, Romania*

<sup>b</sup> *National Institute for Research & Development in Chemistry and Petrochemistry – ICECHIM Bucharest, 202 Splaiul Independentei, Bucharest 060021, Romania*

\* Corresponding authors

E-mail addresses: [gabi2ionita@yahoo.com](mailto:gabi2ionita@yahoo.com) (G. Ionita), [aricov\\_ludmila@yahoo.com](mailto:aricov_ludmila@yahoo.com) (L. Aricov)

**Table S1.** Yield stress values of alginate and functionalized alginate gels

| <b>System</b>               | <b><math>\sigma^*</math> (Pa)</b> |
|-----------------------------|-----------------------------------|
| Alg                         | 377                               |
| Alg-1,2- $\beta$ -CD        | 913                               |
| Alg-1,3- $\beta$ -CD        | 872                               |
| Alg-1,6- $\beta$ -CD        | 2563                              |
| Alg-Ad                      | 803                               |
| Alg-1,2- $\beta$ -CD/Alg-Ad | 3450                              |
| Alg-1,3- $\beta$ -CD/Alg-Ad | 6961                              |
| Alg-1,6- $\beta$ -CD/Alg-Ad | 9860                              |

**Table S2.** Assignment of the main vibrational modes of unmodified alginate, functionalised alginates and mixtures of functionalized alginates

| <b>Xerogel</b>      | <b>Wavenumber (cm<sup>-1</sup>)<sup>a</sup></b>                                                                                                                                                           | <b>Assignment<sup>b</sup></b>                                                                                                                                                                                                                                                                                   |
|---------------------|-----------------------------------------------------------------------------------------------------------------------------------------------------------------------------------------------------------|-----------------------------------------------------------------------------------------------------------------------------------------------------------------------------------------------------------------------------------------------------------------------------------------------------------------|
| Alg                 | 3345, 3228 (s); broad<br>2934, 2853 (w)<br><b>1595</b> (s)<br><b>1425</b> (m)<br>1308 (w)<br>1144, 1113 (w)<br>1078 (sh), 1017 (s)<br><br><i>fingerprint region</i><br>964, 938 (m)<br>887 (w)<br>820 (m) | v(O-H), hydrogen bonded<br>v(C-H)<br>v <sub>a</sub> (COO <sup>-</sup> )<br>v <sub>s</sub> (COO <sup>-</sup> )<br>δ(C-C-H) + δ(O-C-H)<br>v(C-O) + v(C-C) + v(C-O-C)<br>v(C-O) + v(C-C) + δ(C-C-C)<br><br>v(C-O) + v(C-C) + δ(C-C-O) (M+G)<br>δ(C1-H) (M+G)<br>δ(C-C-O) + δ(C-C-H) (M)                            |
| Alg-Ad              | 3348, 3230 (s); broad<br><b>1623</b> (sh, s)<br><b>1600</b> (s)<br><b>1433</b> (m)<br>1307 (w)<br>1146, 1114 (m)<br>1079, 1018 (m)<br><br><i>fingerprint region</i><br>962, 940 (m)<br>888 (w)<br>821 (m) | v(O-H) + v(N-H), hydrogen bonded<br>v(C=O)<br>v <sub>a</sub> (COO <sup>-</sup> )<br>v <sub>s</sub> (COO <sup>-</sup> ) + v(C-N) + δ(N-H)<br>δ(C-C-H) + δ(O-C-H)<br>v(C-O) + v(C-C) + v(C-O-C)<br>v(C-O) + v(C-C) + δ(C-C-C)<br><br>v(C-O) + v(C-C) + δ(C-C-O) (M+G)<br>δ(C1-H) (M+G)<br>δ(C-C-O) + δ(C-C-H) (M) |
| Alg-1,2-β-CD        | 3360, 3238 (s); broad<br><b>1623</b> (s)<br><b>1443</b> (w)<br>1150, 1113 (w)<br>1078, 1025 (m)<br><br><i>fingerprint region</i><br>963, 941 (w)<br>823 (m)                                               | v(O-H) + v(N-H), hydrogen bonded<br>v(C=O)<br>v(C-N) + δ(N-H)<br>v(C-O) + v(C-C) + v(C-O-C)<br>v(C-O) + v(C-C) + δ(C-C-C)<br><br>v(C-O) + v(C-C) + δ(C-C-O) (M+G)<br>δ(C-C-O) + δ(C-C-H) (M)                                                                                                                    |
| Alg-1,2-β-CD/Alg-Ad | 3350, 3230 (s); broad<br><b>1615</b> (s); less sharp, broader<br><b>1434</b> (m)<br>1149, 1115 (w)<br>1079, 1025 (m)<br><br><i>fingerprint region</i><br>962, 940 (w)<br>890 (w)<br>820 (m)               | v(O-H) + v(N-H), hydrogen bonded<br>v(C=O)<br>v(C-N) + δ(N-H)<br>v(C-O) + v(C-C) + v(C-O-C)<br>v(C-O) + v(C-C) + δ(C-C-C)<br><br>v(C-O) + v(C-C) + δ(C-C-O) (M+G)<br>δ(C1-H) (M+G)<br>δ(C-C-O) + δ(C-C-H) (M)                                                                                                   |

<sup>a</sup> s, strong; sh, shoulder; w, weak; m, medium; <sup>b</sup> v, stretching; δ, deformation (bending)

**Table S3.** Rotational correlation time ( $\tau$ ) values for alginate samples in aqueous solution (1%)

| <b>System</b>          | <b><math>\tau \times 10^{10}</math> (s)</b> | <b><math>\tau \times 10^{10}</math> (s)</b><br>(mixture with Alg-Ad-T) |
|------------------------|---------------------------------------------|------------------------------------------------------------------------|
| Alg-T                  | 3.7                                         | -                                                                      |
| Alg-Ad-T               | 3.9                                         | -                                                                      |
| Alg-1,2- $\beta$ -CD-T | 7.3                                         | 6.6                                                                    |
| Alg-1,3- $\beta$ -CD-T | 3.4                                         | 4.2                                                                    |
| Alg-1,6- $\beta$ -CD-T | 3.9                                         | 4.2                                                                    |

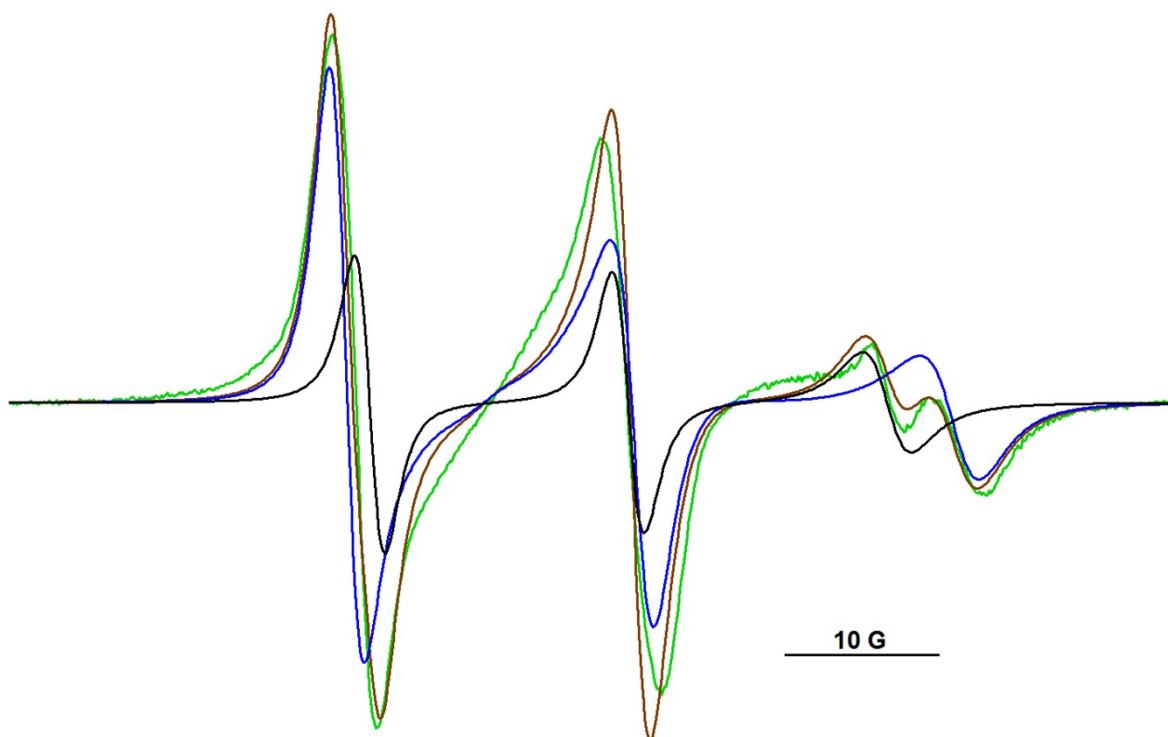

**Fig. S1.** The EPR spectra of 4-carboxy-TEMPO in Alg-1,2-β-CD gel: experimental (green), simulated (brown), slower component (blue), faster component (black).

**Table S4.** The ratio between the two components and the distance between outer peaks ( $2A_{zz}$ , in G) in the EPR spectra of spin-labelled alginate gels and their mixtures

| System                 | One alginate                        |           | Mixture of Alg-Ad-T and Alg-1,n- $\beta$ -D-T |           |
|------------------------|-------------------------------------|-----------|-----------------------------------------------|-----------|
|                        | Ratio slow component/fast component | $2A_{zz}$ | Ratio slow component/fast component           | $2A_{zz}$ |
| Alg-Ad-T               |                                     | 57.4      | -                                             | -         |
| Alg-1,2- $\beta$ -CD-T | 4.74                                | 57.8      | 4.58                                          | 60.2      |
| Alg-1,3- $\beta$ -CD-T | 3.66                                | 62.1      | 4.64                                          | 63.5      |
| Alg-1,6- $\beta$ -CD-T | 2.15                                | 60.4      | 3.78                                          | 61.0      |

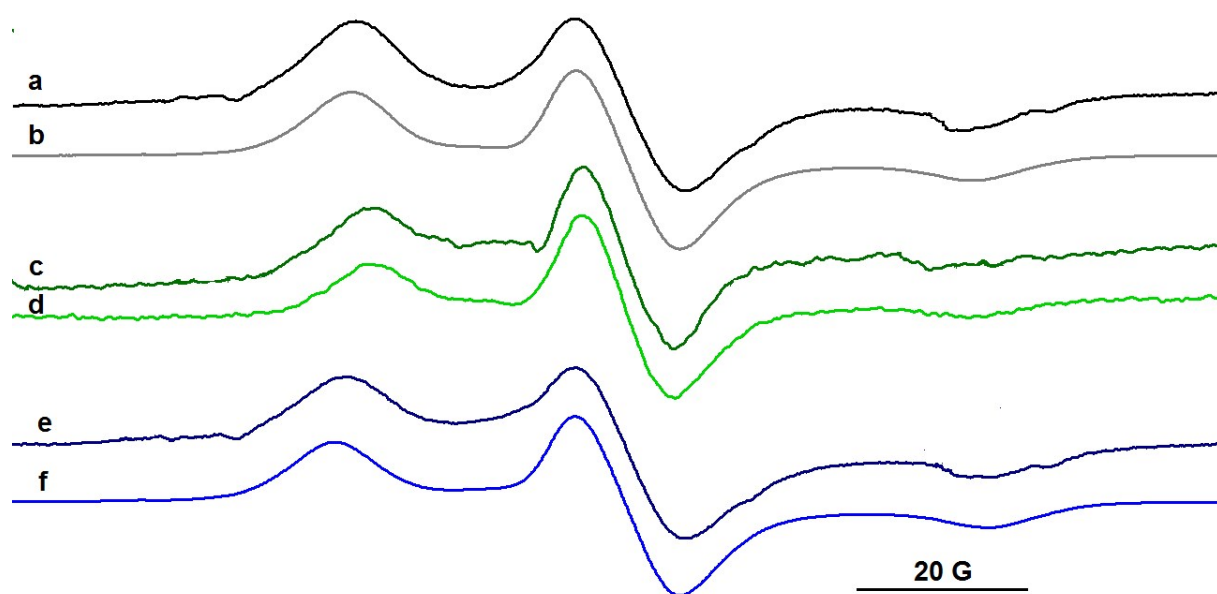

**Fig. S2.** The EPR spectra of alginates recorded at 120 K: a) Alg-1,2- $\beta$ -CD-T solution, b) Alg-1,2- $\beta$ -CD-T gel, c) 4-amino-TEMPO in Alg-1,2- $\beta$ -CD solution, d) 4-amino-TEMPO in Alg-1,2- $\beta$ -CD gel, e) Alg-1,2- $\beta$ -CD-T solution in the presence of 1-adamantanecarboxylic acid, f) Alg-1,2- $\beta$ -CD-T gel in the presence of 1-adamantanecarboxylic acid.
